# Supplementary material for: Contributions of equatorial waves and small-scale convective gravity waves to the 2019/20 quasi-biennial oscillation (QBO) disruption
Source: Copernicus journal article supplement (doi:10.5194/acp-21-9839-2021), 2021-07-01
Supplement: Supplementary file 1 [file acp-21-9839-2021-supplement.pdf]

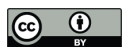

*Supplement of*

**Contributions of equatorial waves and small-scale convective gravity waves to the 2019/20 quasi-biennial oscillation (QBO) disruption**

**Min-Jee Kang and Hye-Yeong Chun**

*Correspondence to:* Hye-Yeong Chun ([chunhy@yonsei.ac.kr](mailto:chunhy@yonsei.ac.kr))

The copyright of individual parts of the supplement might differ from the article licence.

# Kelvin

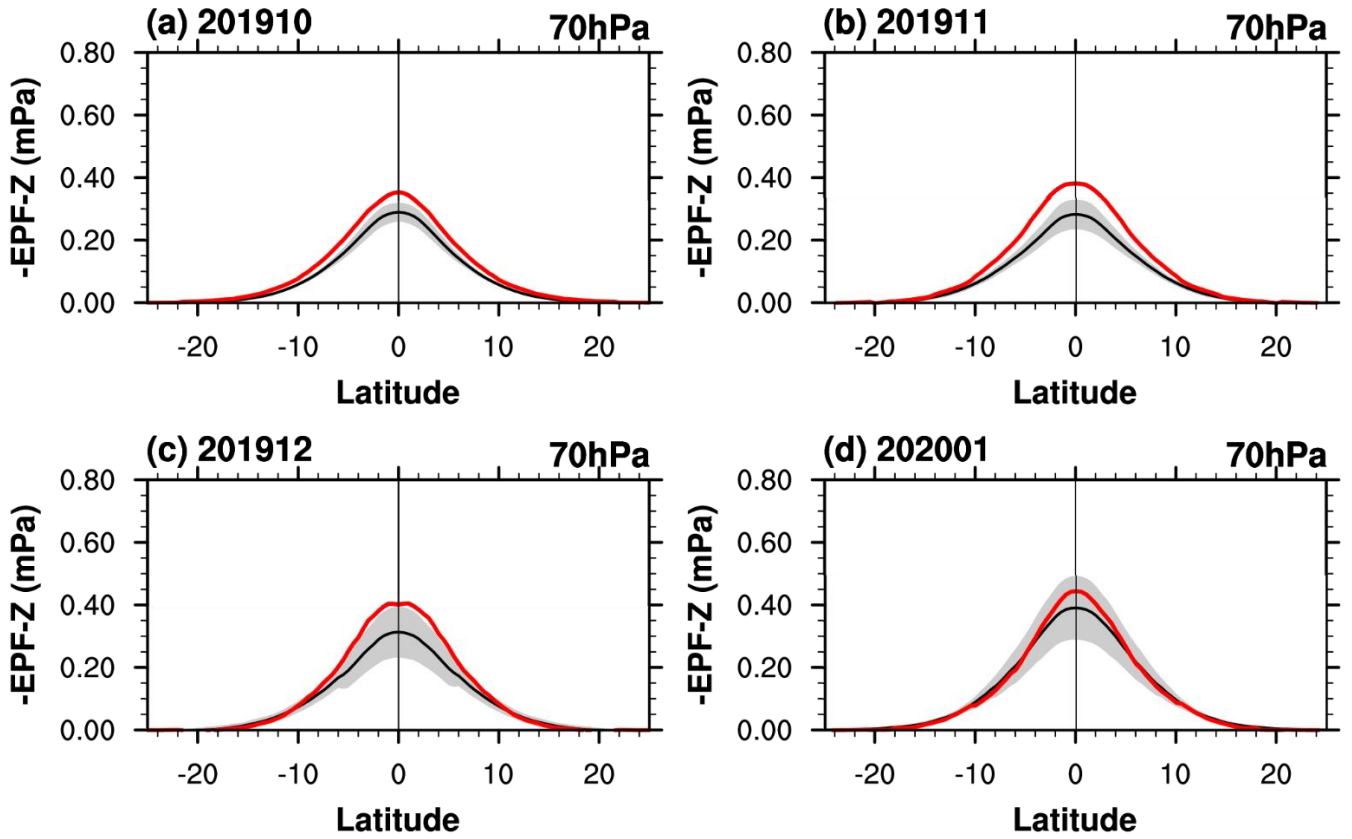

**Figure S1.** The vertical EP flux for the Kelvin waves at 70 hPa multiplied by -1 during the disruption (red) and the monthly climatology (black) along with  $\pm 1$  standard deviation (gray shading) in (a) October 2019, (b) November 2019, (c) December 2019, and (d) January 2020.

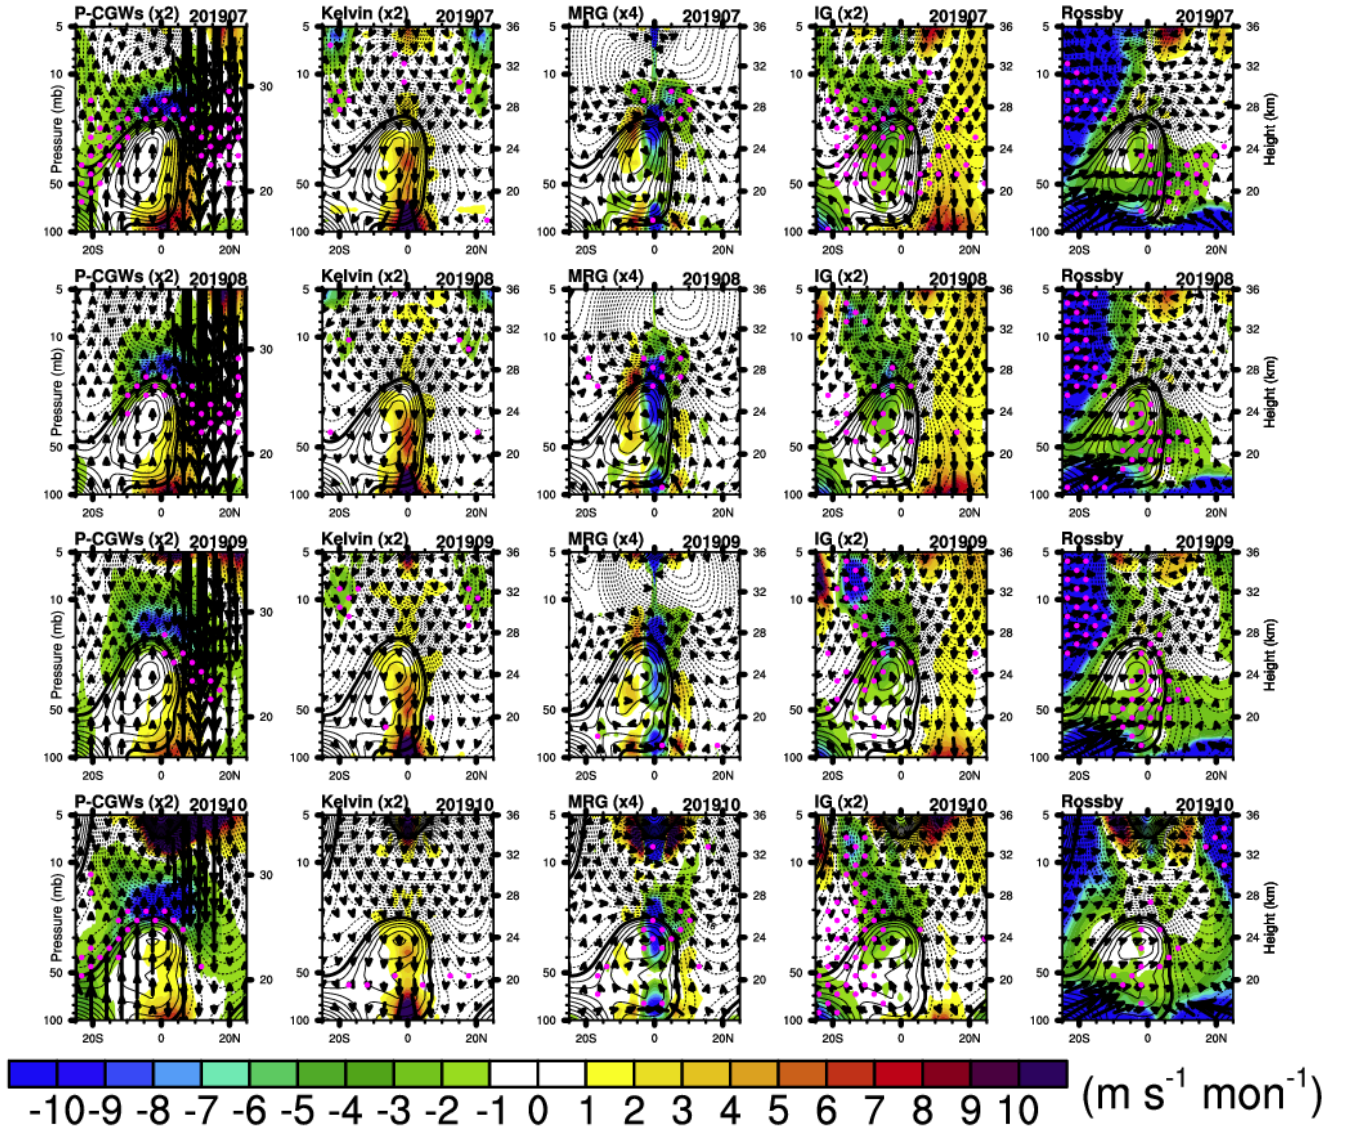

10 **Figure S2.** Latitude-height cross sections of the EP flux vectors and EP flux divergence (EPD) by parameterized CGWs (P-  
 CGWs, multiplied by 2) and resolved equatorial waves, including Kelvin (multiplied by 2), MRG (multiplied by 4), inertia-  
 gravity (IG, multiplied by 2), and Rossby waves from July 2019 to February 2020, superimposed with the zonal-mean zonal  
 wind (contour lines). Positive (negative) zonal winds are plotted with solid (dashed) lines with a contour interval of  $2 \text{ m s}^{-1}$ ,  
 and thick contour lines denote a zero-zonal wind speed. The magenta-colored stippled pattern denotes a region where the  
 15 EPD is smaller than the 1-standard deviation of WQBO climatology.



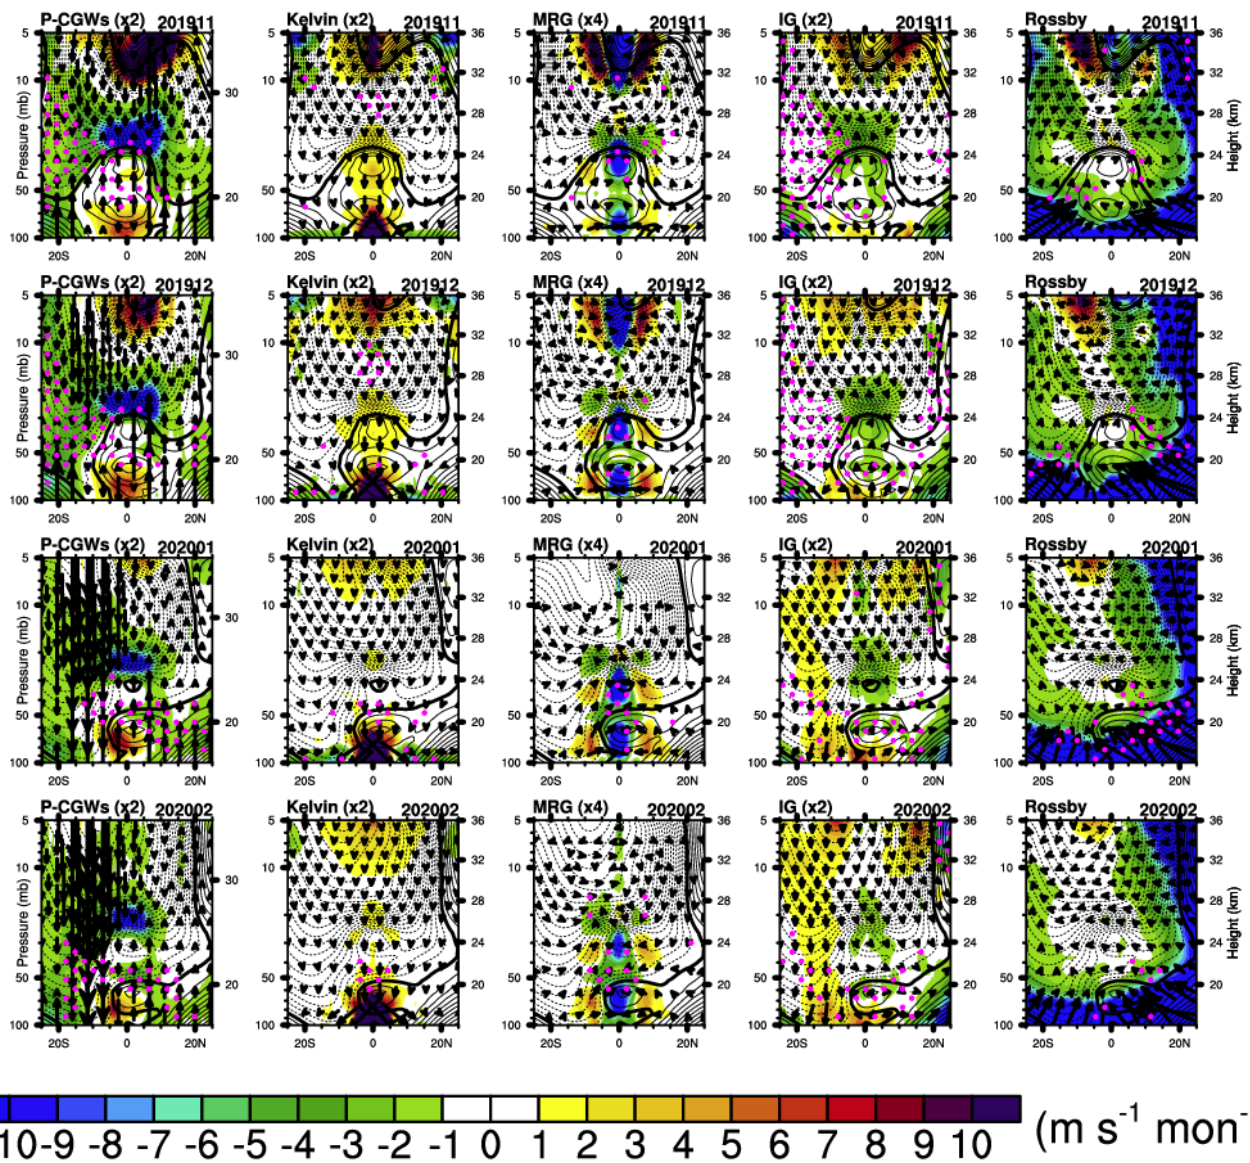

Figure S2. (Continued)

20

25

30

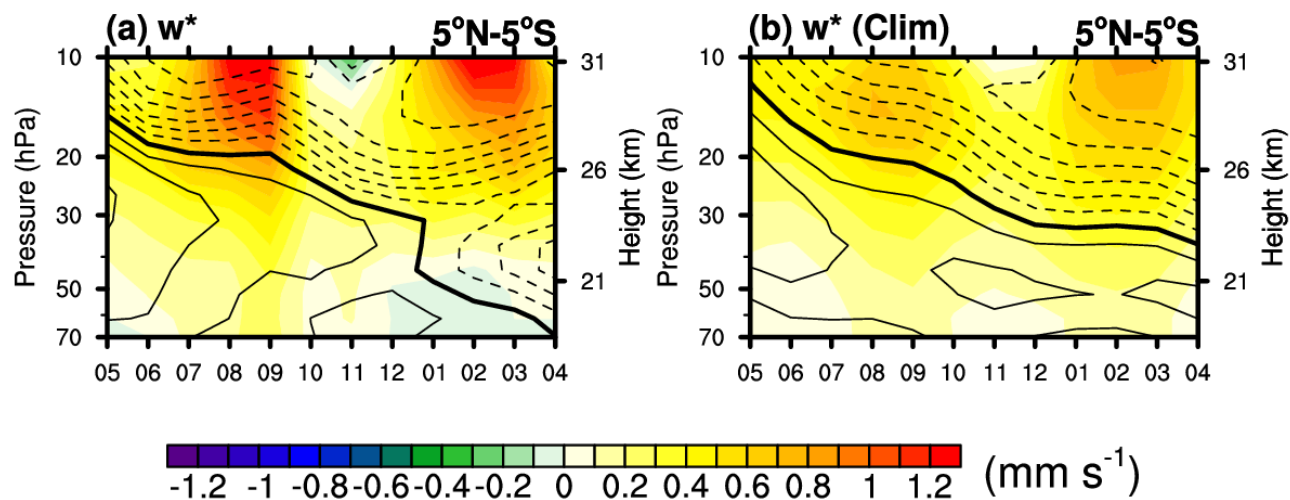

**Figure S3.** Time-height cross section of the vertical upwelling ( $\bar{w}^*$ ) averaged over 5°N–5°S (a) from May 2019 to April 2020 and (b) their climatology from May to April, overlaid with the zonal-mean zonal wind (black contour lines). Positive (negative) zonal winds are plotted with solid (dashed) lines with a contour interval of 5 m s<sup>-1</sup>, and thick contour lines denote a zero zonal wind speed.

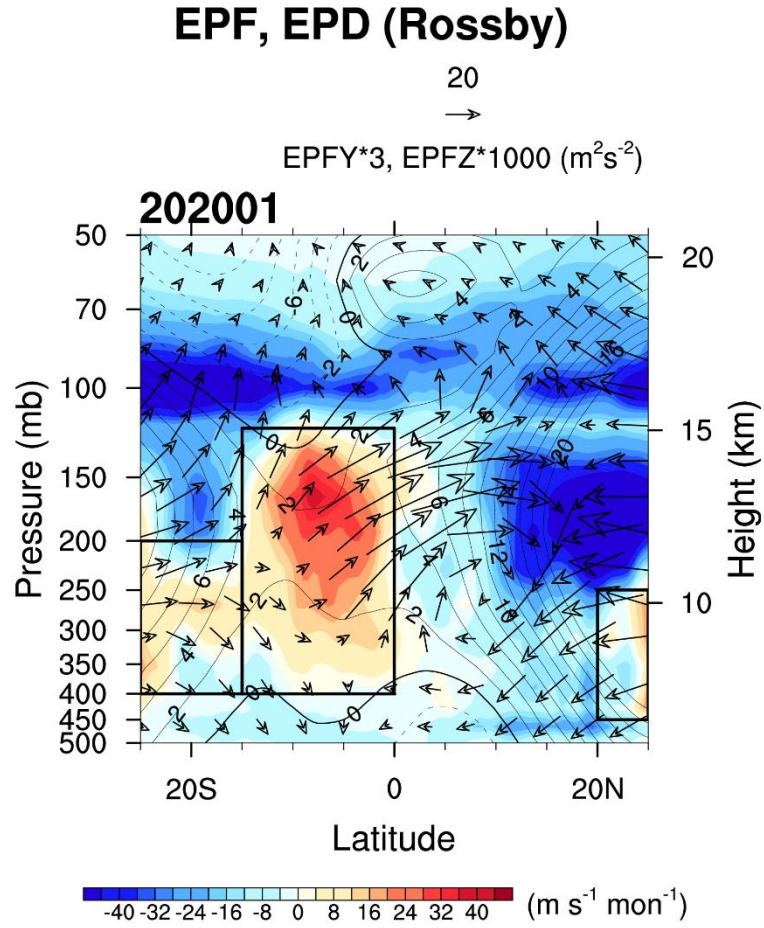

40

**Figure S4.** Latitude–height cross sections of the EP flux (vectors) divided by air density and EP flux divergence (shading) for the Rossby waves and in January 2020. Note that below 100 hPa, the  $L_w$  waves ( $\omega \leq 0.4$  cpd and  $-20 \leq k < 0$ ) are assumed to be the Rossby waves. Black boxes denote the three-potential source regions.

# Precipitation

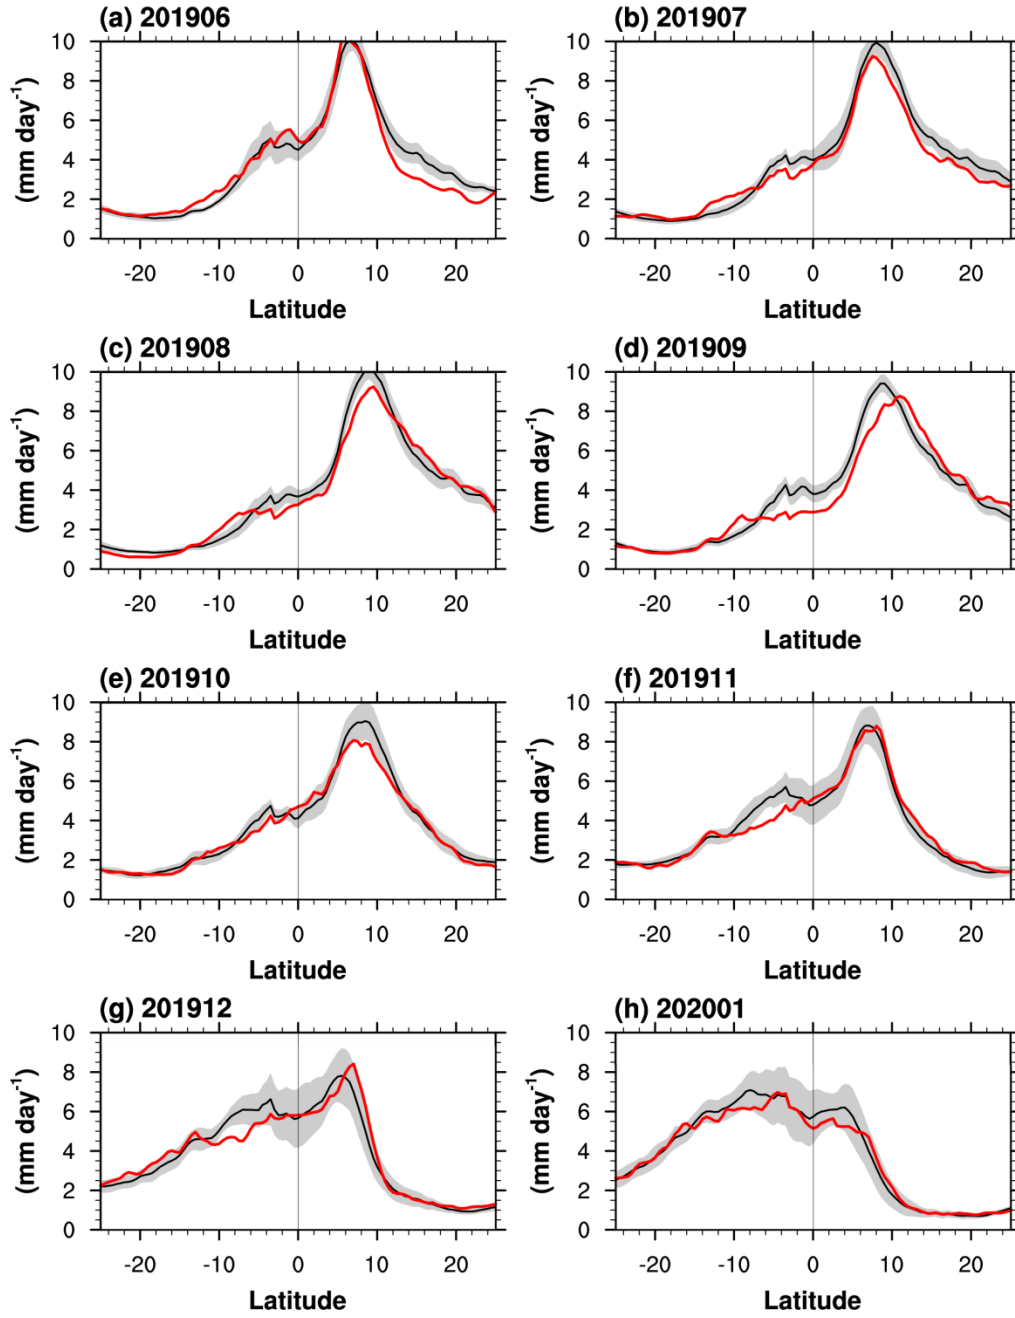

**Figure S5.** MERRA-2 zonal-mean precipitation in (a–h) June 2019–January 2020 and the climatology (black) overlaid with  $\pm 1$  standard deviation (gray shading).

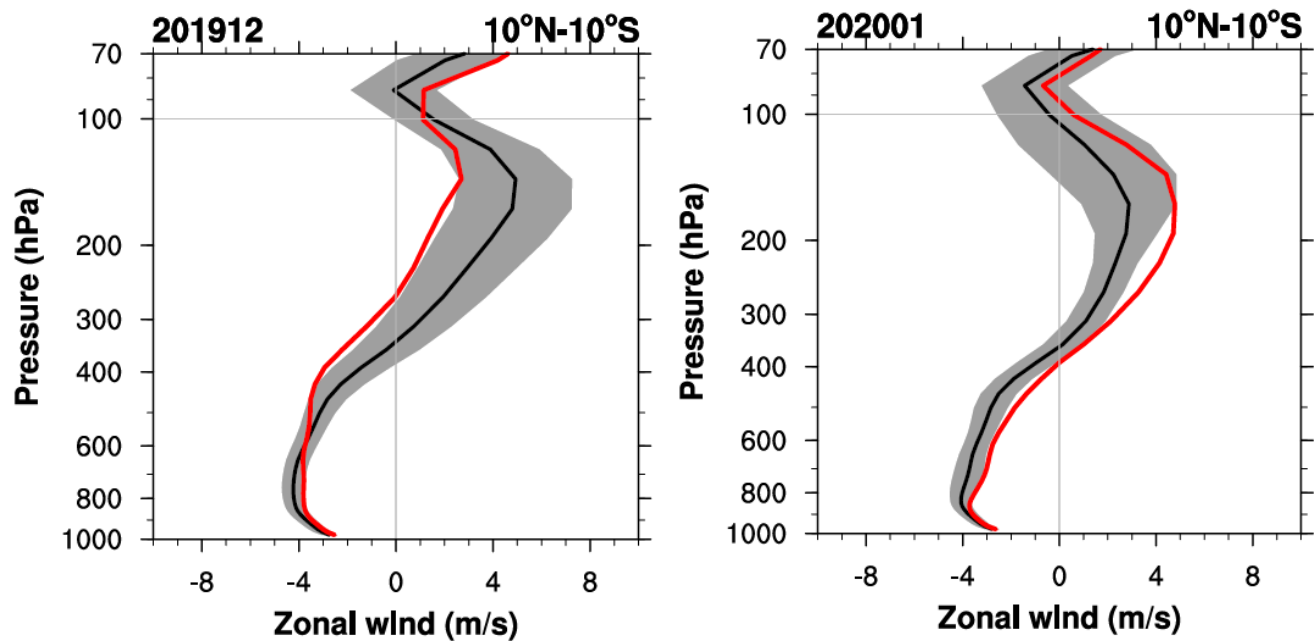

50 **Figure S6.** Vertical profile of the zonal-mean zonal wind averaged over 10°N–10°S in (left) December 2019 and (right) January 2020. Red lines represent 2019–20 QBO disruption and black lines represent the climatology (defined in Sect. 2.1) with  $\pm 1$  standard deviation (gray shading).
